# Supplementary material for: Inhibitory Effect of Statins on Inflammation-Related Pathways in Human Abdominal Aortic Aneurysm Tissue
Source: PubMed Central journal article supplement (PMC4463697; doi:10.3390/ijms160511213), 2015-05-18
Supplement: ijms-16-11213-s001.pdf [file ijms-16-11213-s001.pdf]

# Supplementary Information

**Figure 1A**

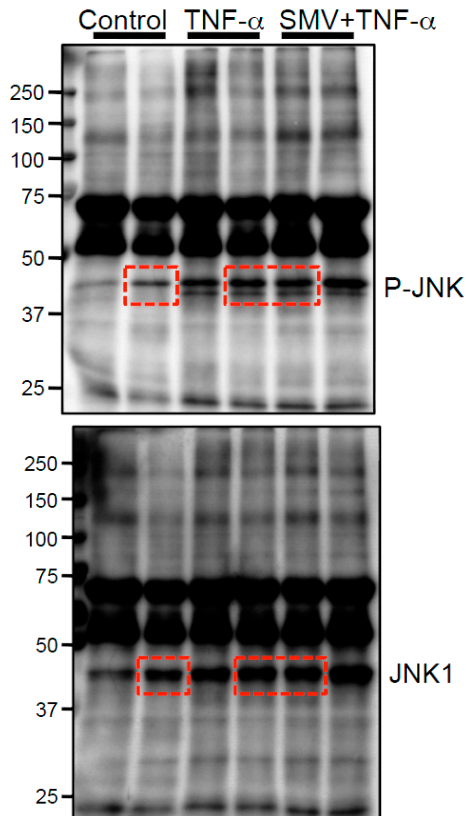

**Figure 1B**

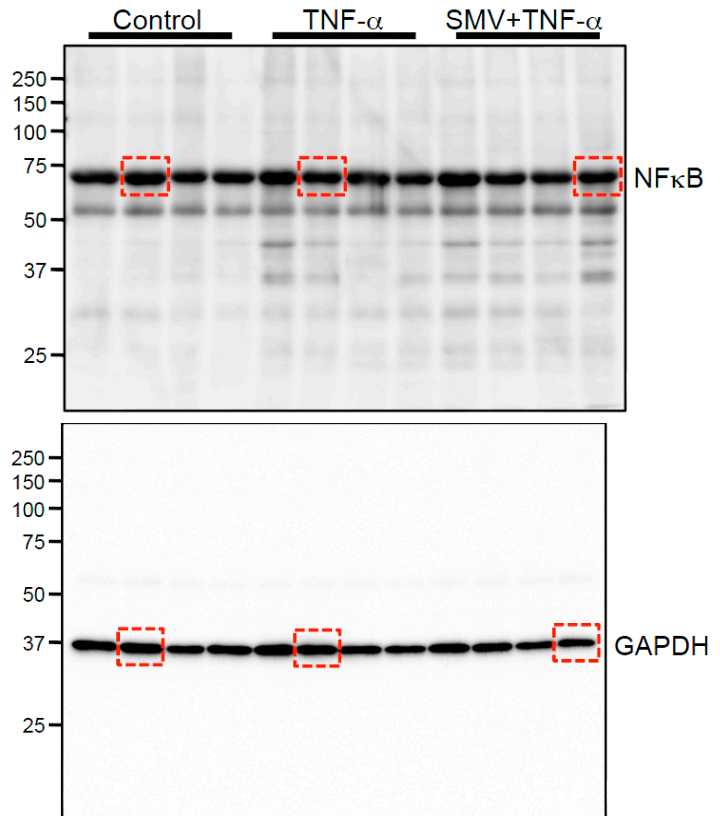

**Figure 2C**

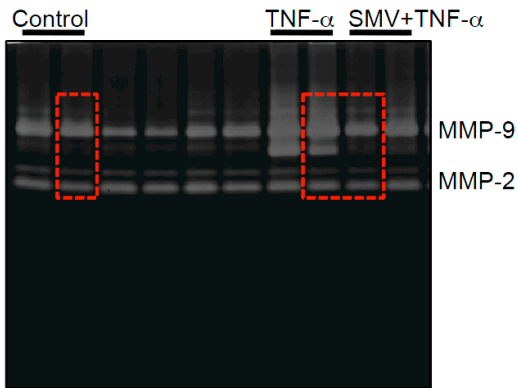

**Figure 2D**

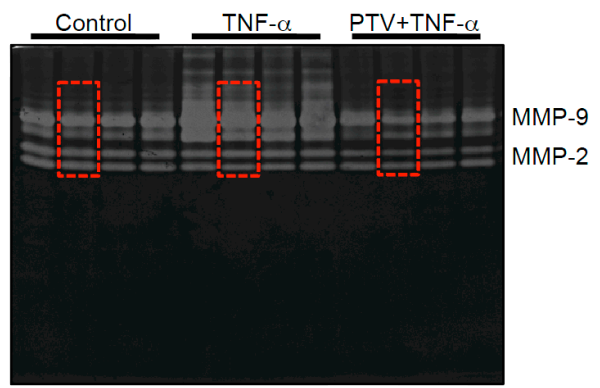

**Figure 5B**

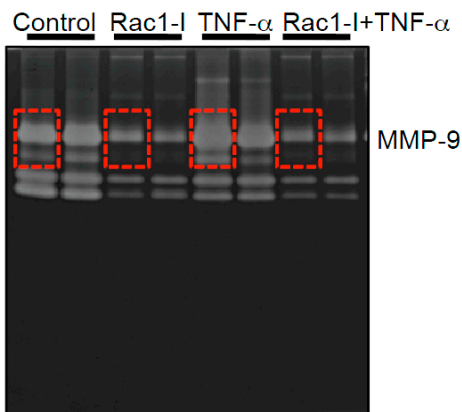

**Figure 6A**

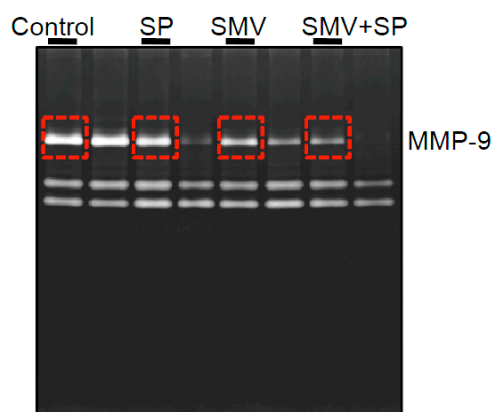

**Figure S1.** Uncropped full-length pictures of western blotting membranes and zymography gels.

**Table S1.** Clinical characteristics of patients.

| <b>No.</b> | <b>Age</b> | <b>Sex</b> | <b>HT</b> | <b>DL</b> | <b>DM</b> | <b>Sm</b> | <b>Statin</b> | <b>AAA Diameter</b> | <b>Allocation to experiments</b> |
|------------|------------|------------|-----------|-----------|-----------|-----------|---------------|---------------------|----------------------------------|
| 1          | 75         | M          | Yes       | No        | No        | Yes       | No            | 50                  | Figures 1 and 3                  |
| 2          | 56         | M          | Yes       | No        | No        | Yes       | No            | 49                  | Figures 1 and 3                  |
| 3          | 77         | M          | Yes       | No        | Yes       | Yes       | No            | 76                  | Figures 1 and 3                  |
| 4          | 72         | M          | Yes       | No        | No        | Yes       | No            | 79                  | Figures 1 and 3                  |
| 5          | 86         | M          | Yes       | No        | No        | Yes       | No            | 55                  | Figures 2 and 4                  |
| 6          | 76         | M          | Yes       | No        | No        | Yes       | No            | 58                  | Figures 2 and 4                  |
| 7          | 88         | M          | Yes       | No        | No        | Yes       | No            | 58                  | Figures 2 and 4                  |
| 8          | 68         | M          | Yes       | Yes       | No        | Yes       | No            | 90                  | Figures 2 and 4                  |
| 9          | 91         | M          | Yes       | No        | No        | Yes       | No            | 50                  | Figures 2 and 4                  |
| 10         | 58         | M          | Yes       | Yes       | Yes       | Yes       | No            | 51                  | Figure 5                         |
| 11         | 63         | M          | No        | Yes       | No        | Yes       | No            | 83                  | Figure 5                         |
| 12         | 79         | M          | No        | No        | No        | Yes       | No            | 65                  | Figure 5                         |
| 13         | 55         | M          | Yes       | No        | No        | Yes       | No            | 80                  | Figure 5                         |
| 14         | 76         | M          | Yes       | No        | No        | Yes       | No            | 48                  | Figure 6                         |
| 15         | 80         | M          | Yes       | No        | No        | Yes       | No            | 52                  | Figure 6                         |
| 16         | 86         | M          | Yes       | No        | No        | Yes       | No            | 65                  | Figure 6                         |
| 17         | 72         | M          | Yes       | No        | No        | Yes       | No            | 95                  | Figure 6                         |

M, male; HT, hypertension; DL, dyslipidemia; DM, diabetes mellitus; Sm, smoking; AAA, abdominal aortic aneurysm.
